# Supplementary material
Source: publisher figshare collection journal article supplement (https://acs.figshare.com/ndownloader/files/5681952)
Supplement: Supplementary file 1 [file 5681952]

RECEIVED

JUN 22 2003

BY: \_\_\_\_\_

## Supporting information

## Conversion of monomer

The extent of monomer conversion is measured with FT-IR before and after polymerization. Figure 1 shows the FT-IR spectra (a) monomer, (b) polymer, (c) and (d) nanocomposites. For the TMSPMA monomer, a characteristic C=C stretch vibration appears at  $1638\text{ cm}^{-1}$  and an ester group vibration appears at  $1720\text{ cm}^{-1}$ . After polymerization, both bulk poly(TMSPMA) and the nanocomposites display a broad and intense band between  $3300$  and  $3700\text{ cm}^{-1}$  from the silanol Si-OH groups, which possibly results in adsorption of water molecules on the surface of the pore channels. A weak peak at  $1633$ ,  $1640$ ,  $1641\text{ cm}^{-1}$  is probably related to residual C=C groups and water in the system. In addition, an extraction experiment exhibits no significant weight loss for the samples, indicating a complete polymerization. Thus, the peak in the range of  $1633$ - $1641\text{ cm}^{-1}$  is probably due to water. However, the bulk polymer and nanocomposites were synthesized under the same conditions (initiator concentration, temperature, and time), so it is reasonable to compare their mechanical properties and thermal stability.

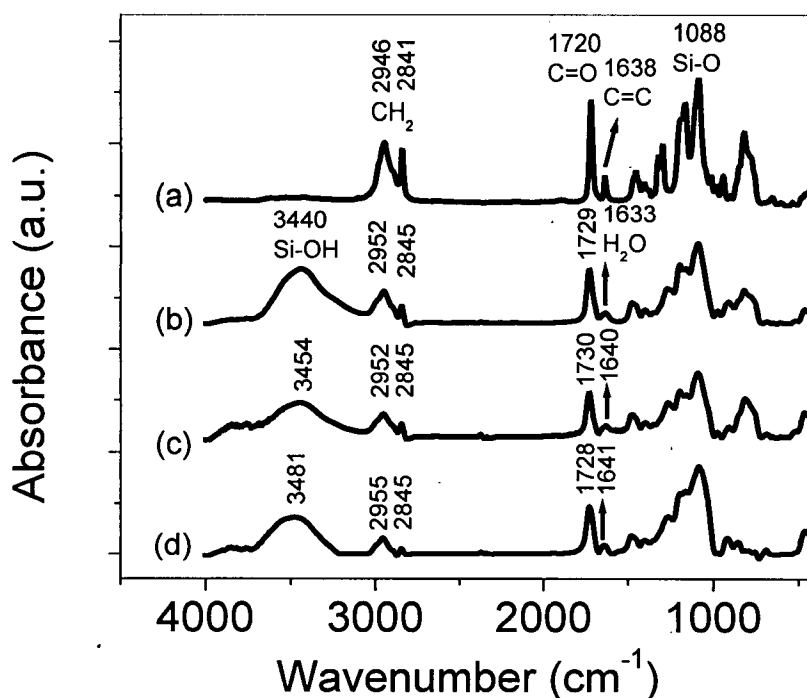

Figure 1. FT-IR spectra (a) TMSPMA, (b) poly(TMSPMA), (c) nanocomposite with 8.4 wt% silica particles, (d) nanocomposite with 28.2 wt% silica particles.
